# Supplementary material for: Fluorescent Quinolinium Derivative as Novel Mitochondria Probe and Function Modulator by Targeting Mitochondrial RNA
Source: MDPI journal article supplement (doi:10.3390/molecules28062690), 2023-03-16
Supplement: s1 [file s1]

---

## *Supplementary Information*

# Fluorescent Quinolinium Derivative as Novel Mitochondria Probe and Function Modulator by Targeting Mitochondrial RNA

Bo-Zheng Wang <sup>†</sup>, Ying-Chen Zhou <sup>†</sup>, Yu-Wei Lin <sup>†</sup>, Xiu-Cai Chen, Ze-Yi Yu, Yao-Hao Xu, Jia-Heng Tan, Zhi-Shu Huang and Shuo-Bin Chen <sup>\*</sup>

Guangdong Provincial Key Laboratory of New Drug Design and Evaluation, School of Pharmaceutical Sciences, Sun Yat-sen University, Guangzhou 510006, China

<sup>\*</sup> Correspondence: chenshb8@mail.sysu.edu.cn

<sup>†</sup> These authors contributed equally to this work.

## Table of Contents

|                  |                                                                                                    |    |
|------------------|----------------------------------------------------------------------------------------------------|----|
| <b>Figure S1</b> | mtDNA copy numbers of RKO cells treated by <b>QUCO-1</b> .                                         | S2 |
| <b>Figure S2</b> | Systemically evaluation of glycolysis function with <b>QUCO-1</b> treatment after 24 h.            | S2 |
| <b>Figure S3</b> | Co-localization of <b>QUCO-1</b> and mitochondria in NCM460 with different time and concentration. | S3 |
| <b>Table S1</b>  | Summarize optical properties of the fluorescent probe                                              | S3 |
|                  | Method of measuring optical properties of the fluorescent probe                                    | S3 |
|                  | <sup>1</sup> H NMR, <sup>13</sup> C NMR and HRMS Spectrum of <b>QUCO-1</b>                         | S4 |

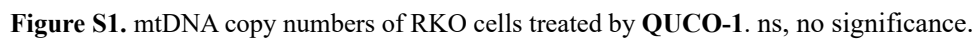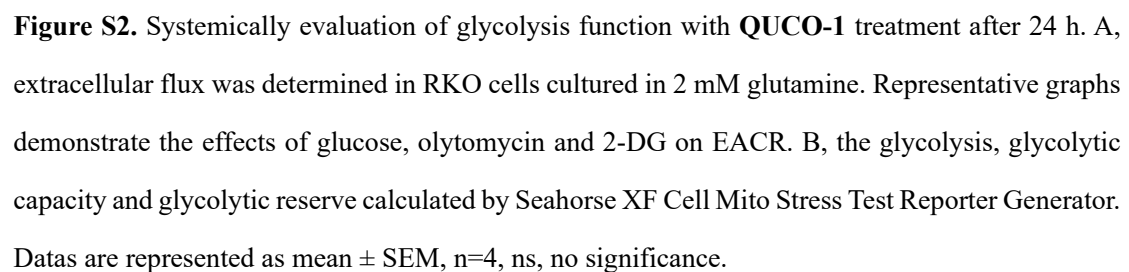

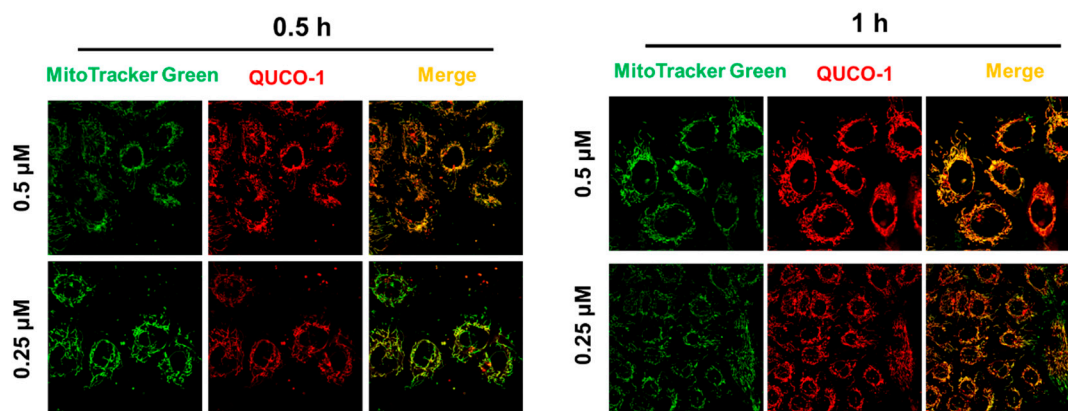

**Figure S3.** Co-localization of **QUCO-1** and mitochondria in NCM460 with different time and concentration.

**Table S1.** Summarize optical properties of the fluorescent probe

| Solvents                   | H <sub>2</sub> O | MeCN  | MeOH  | EtOH  | EA    | DCM   |
|----------------------------|------------------|-------|-------|-------|-------|-------|
| Emission                   | 518              | 525   | 523   | 535   | 543   | 556   |
| Absorbance                 | 658              | 654   | 651   | 653   | 654   | 639   |
| Stokes' shift              | 140              | 129   | 128   | 118   | 111   | 83    |
| Molar absorptivity         | 30000            | 39000 | 50000 | 47000 | 10000 | 36000 |
| Fluorescence quantum yield | 0.006            | 0.106 | 0.083 | 0.126 | 0.103 | 0.148 |

### Method of measuring optical properties of the fluorescent probe

Fluorescence studies were performed on Fluoromax-4 Spectrofluorometer (HORIBA, Japan). A quartz cuvette with 2 mm × 10 mm path length was used for the spectra recorded at 1 nm excitation and emission slit widths unless otherwise specified. All parameters were measured and calculated in classic methods. The absolute fluorescence quantum yield ( $\Phi_F$ ) of QUCO-1 was measured by Quanta-Phi module for Fluoromax-4 Spectrofluorometer.

Some  $^1\text{H}$  NMR,  $^{13}\text{C}$  NMR, HRMS and HPLC spectrum of 2, 3, 4 and QUCO-1

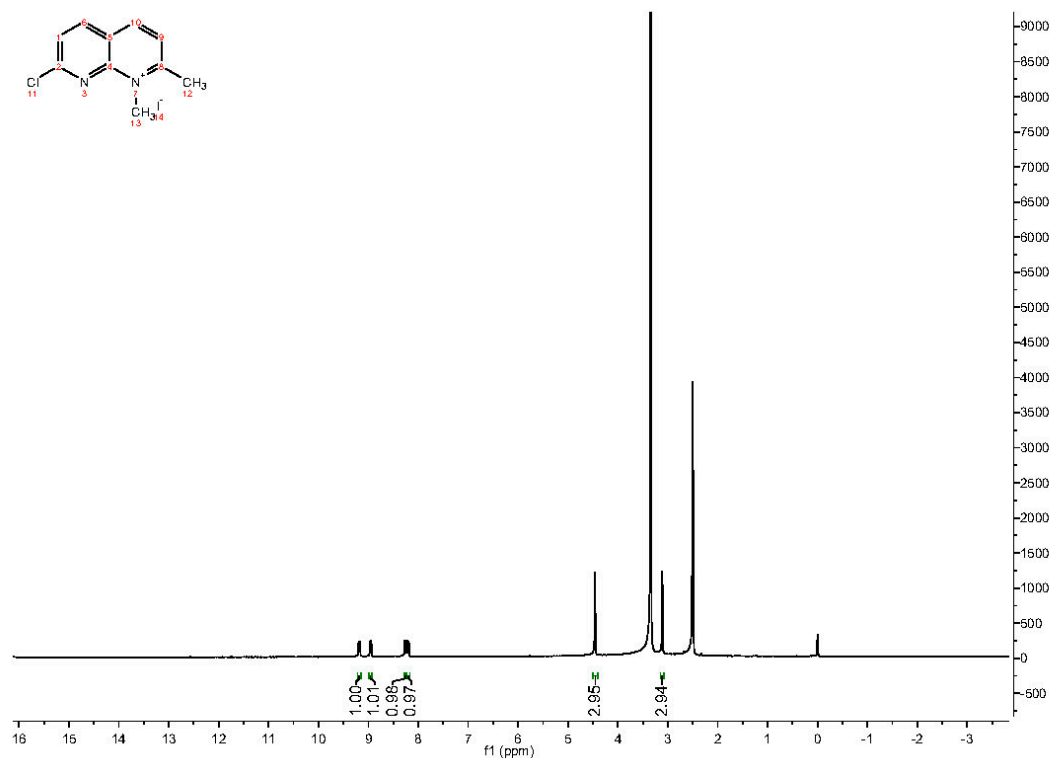

$^1\text{H}$  NMR spectrum of 2

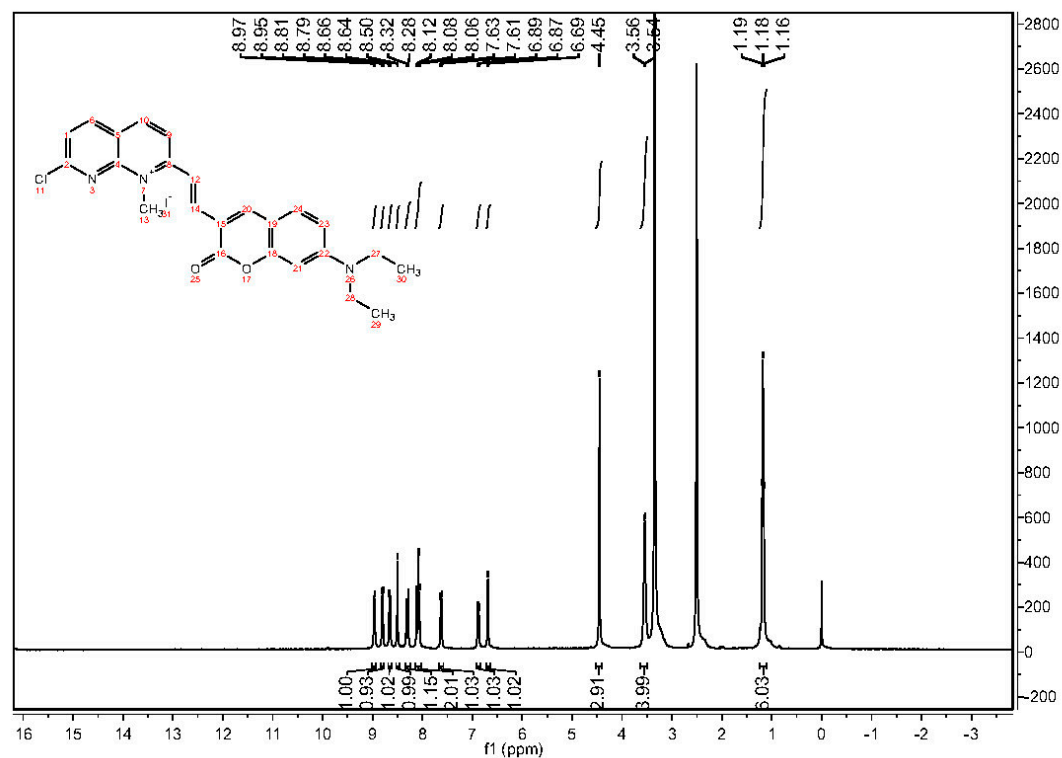

$^1\text{H}$  NMR spectrum of 3

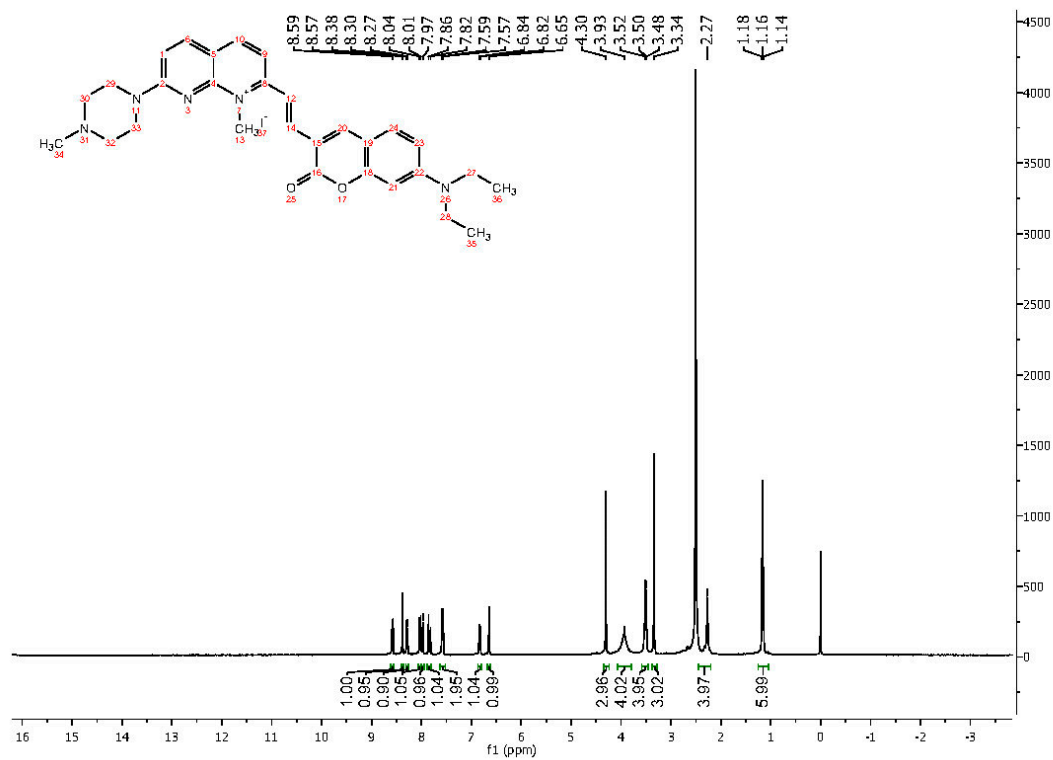

**<sup>1</sup>H NMR spectrum of QUCO-1**

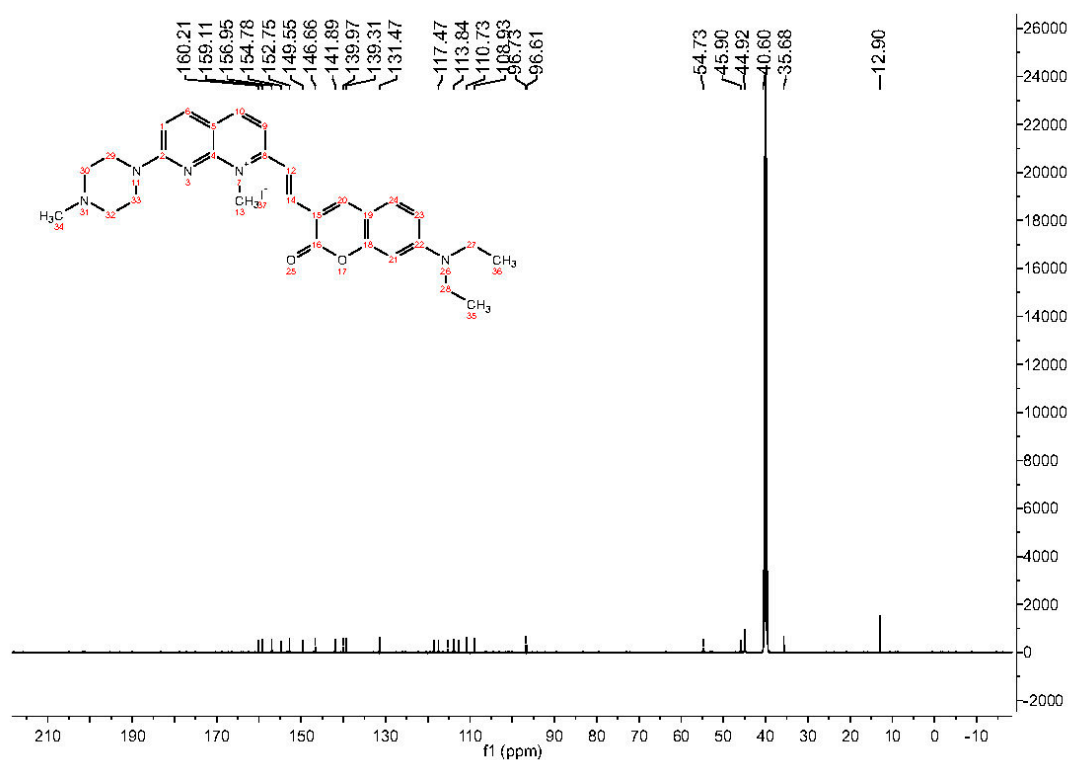

**<sup>13</sup>C NMR spectrum of QUCO-1**

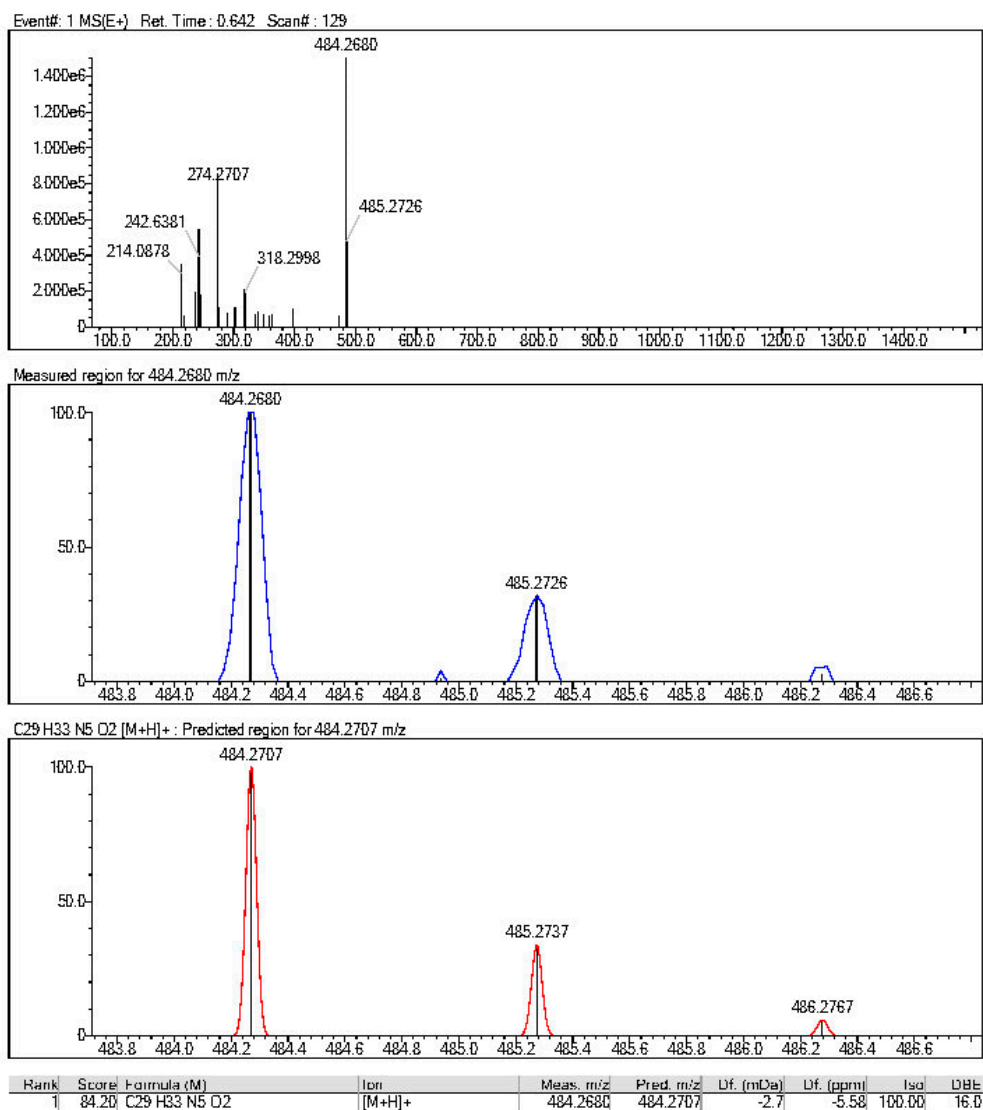

HRMS spectrum of **QUCO-1**

<Chromatogram>

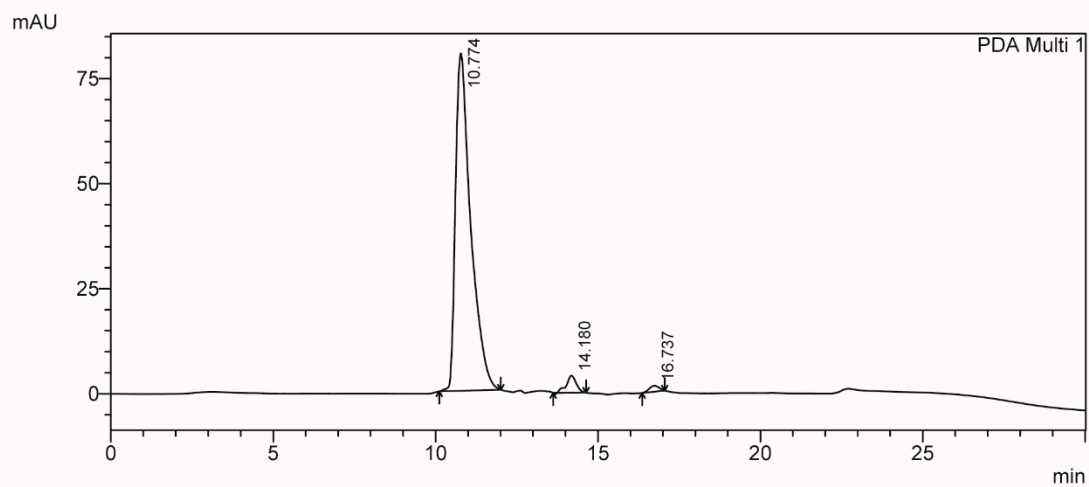

1 PDA Multi 1/254nm 4nm

PeakTable

PDA Ch1 254nm 4nm

| Peak# | Ret. Time | Area    | Height | Area %  | Height % |
|-------|-----------|---------|--------|---------|----------|
| 1     | 10.774    | 2614113 | 80303  | 95.673  | 93.577   |
| 2     | 14.180    | 88086   | 4094   | 3.224   | 4.771    |
| 3     | 16.737    | 30153   | 1418   | 1.104   | 1.652    |
| Total |           | 2732352 | 85815  | 100.000 | 100.000  |

HPLC spectrum of QUCO-1
